# Supplementary material
Source: PubMed Central journal article supplement (PMC2755997)
Supplement: supp_90308.2008_datasupp.pdf [file supp_90308.2008_datasupp.pdf]

1 **Online supplement**

2 **Dynamic CO<sub>2</sub> therapy in periodic breathing – a**  
3 **modeling study to determine optimal timing and**  
4 **dosage regimes**

5 <sup>1,2</sup>Yoseph Mebrate,

6 <sup>1</sup>Keith Willson,

7 <sup>1</sup>Charlotte H. Manisty,

8 <sup>1</sup>Resham Baruah,

9 <sup>1</sup>Jamil Mayet,

10 <sup>1</sup>Alun D. Hughes,

11 <sup>1,3</sup>Kim H. Parker,

12 <sup>1</sup>Darrel P. Francis,

13  
14 <sup>1</sup>International Center for Circulatory Health, St. Mary's Hospital and Imperial  
15 College, London, UK

16 <sup>2</sup>Department of Clinical Engineering, Royal Brompton Hospital, London, UK

17 <sup>3</sup>Department of Bioengineering, Physiological Flow Studies Unit, Imperial College,  
18 London, UK

19 **Contents**

- 20 1. Derivation of the Model Equation  
21 2. Sensitivity Analysis  
22 3. Effect of peak concentration and treatment duration  
23 4. Table of previous studies with calculated values of increase in ventilation due  
24 to inspired CO<sub>2</sub>

25  
26 **1. Derivation of the Model Equation**

27 The fundamental equation that determines  $dc/dt$ , the rate of change of alveolar CO<sub>2</sub>  
28 fraction, can be expressed as shown in Francis et. al. 2000b (reference 12 in the main  
29 manuscript):

30 
$$\frac{dc}{dt} \times V_L = \bar{V}_A \bar{C} - [(\bar{V}_A + v)(\bar{C} + c)] - \beta \bar{Q} c$$

31  $V_L$  represents alveolar volume. Lower case  $c$  is the displacement of  $CO_2$  fraction away  
 32 from its mean value  $\bar{C}$ . Likewise lower case  $v$  represents the displacement of alveolar  
 33 ventilation from its mean value  $\bar{V}_A$ . Because of the time delay, the value of  $v$  at time  $t$   
 34 ( $v_t$ ) depends on the value of  $c$  at some time  $\delta$  previously ( $c_{(t-\delta)}$ ). Near the steady state,  
 35 therefore,  $v_t = S \times c_{(t-\delta)}$ , where  $S$  represents chemoreflex gain (additional ventilation  
 36 per unit increase in  $c$ ). We adopted the convention of using litres for all volumes, and  
 37 minutes for all times.

38 The terms in the above equation represent flow of  $CO_2$  into and out of the lung arising  
 39 from metabolism, ventilation, and exchange with blood stores. Metabolic production  
 40 of  $CO_2$  by the body is expressed as  $\bar{V}_A \bar{C}$ . The rate of  $CO_2$  removal from the lung by  
 41 ventilation is expressed as  $(\bar{V}_A + v)(\bar{C} + c)$ . Oscillations in arterial  $CO_2$  necessitate a  
 42 net transfer of  $CO_2$  from the lung into extra pulmonary stores (in comparison with the  
 43 steady state) at a rate of  $\beta \bar{Q} c$ , where  $\beta$  indicates the solubility of  $CO_2$  in blood and  $\bar{Q}$ ,  
 44 cardiac output, assuming that pulmonary venous  $CO_2$  is stable.

45 For the purpose of our numerical model we define the instantaneous alveolar  $CO_2$   
 46 fraction and ventilation as upper case  $C$  and  $V$  respectively, where  $C = \bar{C} + c$ , and  
 47  $V = \bar{V}_A + v$ . We also define the rate of metabolic production of  $CO_2$  as  $V_{CO_2}$ , where  
 48  $V_{CO_2} = \bar{V}_A \bar{C}$ . Therefore, the above equation can be rewritten as:

49 
$$\frac{d(C - \bar{C})}{dt} \times V_L = V_{CO_2} - VC - \beta \bar{Q}(C - \bar{C})$$

50 The mean value of CO<sub>2</sub> fraction  $\bar{C}$  is not time-variant, i.e.  $d\bar{C}/dt = 0$ . Hence, the  
51 change in instantaneous alveolar CO<sub>2</sub> fraction over the small time step  $\Delta t$  can be  
52 written as Equation 4 in the main manuscript:

53 
$$\Delta C = \frac{\Delta t}{V_L} \times (V_{CO_2} - VC - \beta \bar{Q} (C - \bar{C}))$$

54 We used 1 second steps for the model. We investigated whether a change in the time  
55 step had any effect in the model output, to ensure that the model is not affected by  
56 numerical instability instead of system instability (due to large time steps). We ran the  
57 simulation with time steps of 0.1, 0.5, 1, 5, and 10 seconds. We found no difference in  
58 stability for time steps of 1 second or less. Numerical instability was observed when  
59 the time steps were 5 seconds or more.

## 60 **2. Sensitivity analysis**

61 We further analyzed the sensitivity of the model using extreme (minimum and  
62 maximum) values of its parameters as follows: chemoreflex delay (0.28 and 0.67  
63 min), cardiac output (2.5 and 4.5 l/min), chemoreflex gain (1100 and 1800 l/min/atm),  
64 metabolic production of CO<sub>2</sub> (0.1 and 0.4 l/min) and lung volume (3 and 6 l). These  
65 values were based on previous observations on heart failure patients with periodic  
66 breathing (reference 12 in the main manuscript). We ran simulations on all the 32 (=   
67 2<sup>5</sup>) possible combinations of these extreme cases using 2% peak concentration and  
68 180 degrees duration of treatment episode within the periodic breathing cycle.

69 We measured the magnitude of periodic breathing, i.e. standard deviation of  
70 ventilation, before treatment in all the combinations. We measured the optimum  
71 relative periodic breathing value, i.e. the smallest value of:

| Standard deviation of ventilation after treatment  
Standard deviation of ventilation before treatment

72

73 We measured the optimum phase, i.e. the phase of treatment at which we obtained the  
74 optimum relative periodic breathing value. We also measured the margin of error for  
75 the optimum phase (the window of treatment phase at which periodic breathing is  
76 reduced by at least 30%).

77 Twenty six of the thirty two combinations were unstable; the remaining six produced  
78 a stable or too small ventilatory oscillation pattern to initiate treatment episodes;  
79 hence there were no optimum treatment regions in these cases. Nineteen of the twenty  
80 six unstable combinations responded to the default treatment regime shape (2% peak  
81 concentration and 180 degrees duration of treatment episode within the periodic  
82 breathing cycle). The remaining seven of these unstable combinations did not respond  
83 significantly to the above treatment regime; a change in peak concentration (other  
84 than 2%) and/or a change in *duration* of treatment episode within the periodic  
85 breathing cycle (other than 180 degrees) was needed to generate a reduction of >20%  
86 in periodic breathing. Even in these cases the region of optimal treatment *phase* was  
87 unchanged. For simplicity we have tabulated the results of the simulations that  
88 generated oscillations and responded to the default treatment regime shape because  
89 these are directly mutually comparable (Table S-1).

90 We performed factor analysis with these data, using Design-Expert software (revision  
91 7.1.6). We found that the optimum treatment phase is mainly dictated by the  
92 chemoreflex delay as shown in Figure S-1. The optimum treatment phase for periodic  
93 breathing with shorter chemoreflex delays lay ahead of the peak ventilation whereas  
94 periodic breathing with longer delays lay later than peak ventilation. We also noted

95 that larger lung volumes shifted the optimum treatment phase slightly later in the  
 96 cycle (by 20 degrees for the variation of 3-6 litres).

97 Extreme changes in the various physiological parameters can affect how well the  
 98 model responds to a particular dosing regime (i.e. the optimum relative periodic  
 99 breathing value and margin of error at the optimum treatment phase), but these  
 100 outcomes are not directly correlated to any particular physiological variable.

101 **Table S-1: Simulation results using combinations of extreme (Low 'L' and High 'H')**  
 102 **cases of the model physiological parameters: chemoreflex delay (0.28 and 0.67**  
 103 **min), cardiac output (2.5 and 4.5 l/min), chemoreflex gain (1100 and 1800**  
 104 **l/min/atm), metabolic production of CO<sub>2</sub> (0.1 and 0.4 l/min) and lung volume (3**  
 105 **and 6 l)**

| Simulation number | delta | Q | S | Vco <sub>2</sub> | V <sub>L</sub> | PB untreated (standard deviation of ventilation) | Optimal phase (degrees) | Relative PB at optimum phase | Margin of error at optimum phase (degrees) |
|-------------------|-------|---|---|------------------|----------------|--------------------------------------------------|-------------------------|------------------------------|--------------------------------------------|
| 1                 | L     | L | L | L                | L              | 2.6929                                           | -30                     | 0.5596                       | 05                                         |
| 2                 | H     | L | L | L                | L              | 3.3789                                           | 70                      | 0.4490                       | 15                                         |
| 3                 | L     | H | L | L                | L              | 1.9096                                           | -45                     | 0.0320                       | 60                                         |
| 4                 | H     | H | L | L                | L              | 2.2177                                           | 70                      | 0.1912                       | 75                                         |
| 8                 | H     | H | H | L                | L              | 3.2803                                           | 40                      | 0.8545                       | -                                          |
| 9                 | L     | L | L | H                | L              | 9.6474                                           | -40                     | 0.2118                       | 50                                         |
| 10                | H     | L | L | H                | L              | 13.3839                                          | 60                      | 0.1669                       | 65                                         |
| 13                | H     | H | L | H                | L              | 0.5216                                           | 60                      | 0.2656                       | 90                                         |
| 16                | H     | H | H | H                | L              | 15.3097                                          | 50                      | 0.5990                       | 40                                         |
| 18                | H     | L | L | L                | H              | 2.4360                                           | 90                      | 0.2306                       | 55                                         |
| 20                | L     | L | H | L                | H              | 2.7655                                           | -10                     | 0.6258                       | 10                                         |
| 22                | H     | H | L | L                | H              | 0.9893                                           | 80                      | 0.0402                       | 105                                        |
| 24                | H     | L | L | H                | H              | 3.8526                                           | 90                      | 0.0430                       | 95                                         |
| 25                | L     | H | H | L                | H              | 2.3798                                           | -10                     | 0.0241                       | 30                                         |
| 27                | L     | L | H | H                | H              | 10.5568                                          | -20                     | 0.4194                       | 25                                         |
| 28                | H     | H | H | L                | H              | 2.9465                                           | 80                      | 0.2907                       | 30                                         |
| 30                | H     | L | H | H                | H              | 16.4133                                          | 80                      | 0.2469                       | 20                                         |
| 31                | L     | H | H | H                | H              | 7.9386                                           | -25                     | 0.0209                       | 60                                         |
| 32                | H     | H | H | H                | H              | 11.8448                                          | 70                      | 0.1946                       | 55                                         |

|    |   |   |   |   |   |          |                                                             |
|----|---|---|---|---|---|----------|-------------------------------------------------------------|
| 5  | L | L | H | L | L | 3.4310   | These did not respond to the standard treatment regime      |
| 6  | H | L | H | L | L | 4.3349   |                                                             |
| 7  | L | H | H | L | L | 2.8329   |                                                             |
| 12 | L | L | H | H | L | 15.8887  |                                                             |
| 14 | H | L | H | H | L | 24.4287  |                                                             |
| 15 | L | H | H | H | L | 13.6187  |                                                             |
| 23 | H | L | H | L | H | 3.6245   |                                                             |
| 11 | L | H | L | H | L | 0.0431   | These were either stable or produced too small oscillations |
| 17 | L | L | L | L | H | 0.0072   |                                                             |
| 19 | L | H | L | L | H | 2.24E-04 |                                                             |
| 21 | L | L | L | H | H | 4.54E-04 |                                                             |
| 26 | L | H | L | H | H | 3.30E-05 |                                                             |
| 29 | H | H | L | H | H | 0.0332   |                                                             |

106  
107

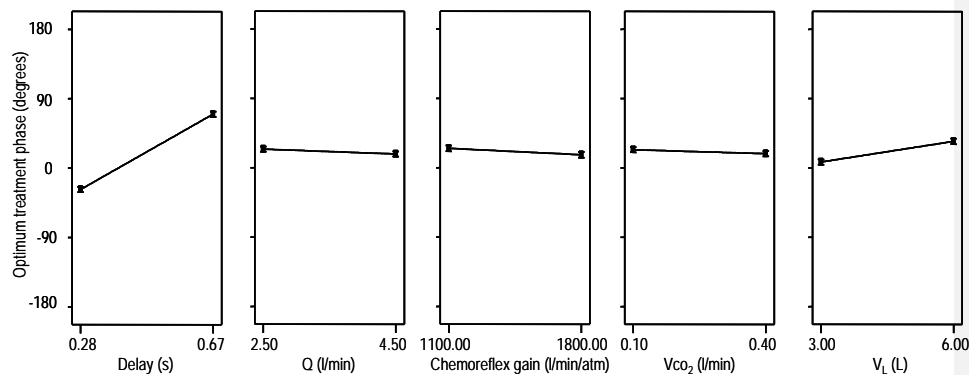

108  
109

**Figure S-1: Physiological parameter dependence of the optimum treatment phase.**

110 The optimum treatment phase is notably affected by the chemoreflex delay and to a lesser extent the lung volume,  
111 but not by cardiac output, chemoreflex gain and the metabolic production rate of CO<sub>2</sub>.

### 112 3. Effect of peak concentration and treatment duration

113 By varying both duration and concentration, it is possible to produce a 3-dimensional

114 (3D) representation of efficacy of treatment. Figure S-2 demonstrates that the

115 periodic breathing can be exacerbated as well as improved.

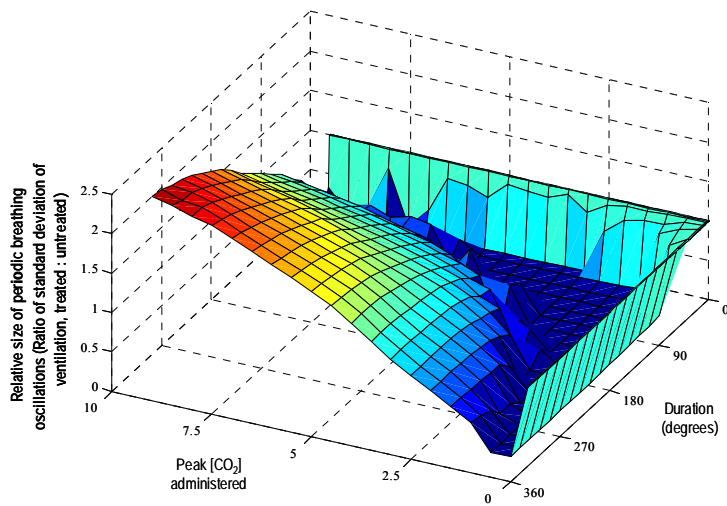

116

117 **Figure S-2: 3D image of the effect of concentration (%) and treatment duration**  
 118 **(degrees)**

119 The periodic breathing can be worsened (areas shaded orange and red) as well as improved (areas shaded green  
 120 and blue) by varying treatment duration and peak CO<sub>2</sub> concentration.

121 **4. Table of previous studies with calculated values of increase in**  
 122 **ventilation due to inspired CO<sub>2</sub>**

123 **Table S-2**

| Author                                  | FiCO <sub>2</sub>                                                         | FetCO <sub>2</sub>  | FetCO <sub>2</sub> -<br>FiCO <sub>2</sub> | Decrease in<br>FetCO <sub>2</sub> -<br>FiCO <sub>2</sub> | Minimum<br>increment in<br>alveolar<br>ventilation that<br>must have<br>occurred with<br>CO <sub>2</sub> treatment |
|-----------------------------------------|---------------------------------------------------------------------------|---------------------|-------------------------------------------|----------------------------------------------------------|--------------------------------------------------------------------------------------------------------------------|
| Berssenbrugge<br><i>et al.</i> 1983 (5) | 0                                                                         | -                   | -                                         | -                                                        | 49%                                                                                                                |
|                                         | >0 such<br>that<br>PaCO <sub>2</sub><br>increased<br>approx. by<br>1 mmHg | -                   | -                                         |                                                          |                                                                                                                    |
| Steens <i>et al.</i><br>1994 (32)       | 0 (no<br>treatment)                                                       | 36.2mmHg<br>(4.76%) | 4.76                                      | 49%                                                      | 96%                                                                                                                |
|                                         | 3%                                                                        | 41.2mmHg<br>(5.42%) | 2.42                                      |                                                          |                                                                                                                    |

|                                       |                  |                  |           |                       |                              |
|---------------------------------------|------------------|------------------|-----------|-----------------------|------------------------------|
| Xie <i>et al.</i> 1997 (39)           | 0 (no treatment) | 5.3%             | 5.3       | 22%                   | 28%                          |
|                                       | 1.65%            | 5.8%             | 4.15      |                       |                              |
| Andreas <i>et al.</i> 1998 (1)        | 0 (no treatment) | -                | -         | -                     | 25% estimated by the authors |
|                                       | -                | +4mmHg           | -         |                       |                              |
| Lorenzi-Filho <i>et al.</i> 1999 (24) | 0 (no treatment) | 4.18%min average | 4.18      | 33%                   | 49%                          |
|                                       | 1.85%            | 4.66%min average | 2.81      |                       |                              |
| Szollosi <i>et al.</i> 2004 (33)      | 0 (no treatment) | 43.2mmHg (5.6%)  | 5.6       | 29%                   | 40%                          |
|                                       | 2.1%             | 46.8mmHg (6.1%)  | 4         |                       |                              |
| Thomas <i>et al.</i> 2005 (35)        | 0 (no treatment) | 35.8mmHg (4.71%) | 4.71      | between -2% and 19.5% | between -2% and +24%         |
|                                       | 0.5-1.5%         | 40.3mmHg (5.3%)  | 3.8 - 4.8 |                       |                              |
